# Supplementary material
Source: PubMed Central journal article supplement (PMC1383545)
Supplement: 7600944s2.pdf [file 7600944s2.pdf]

**A**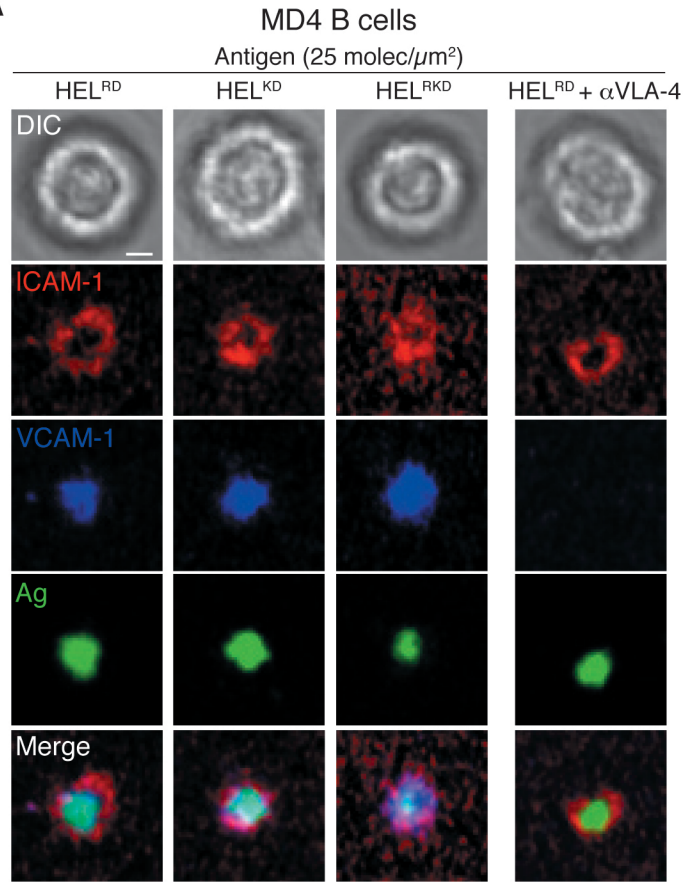**B**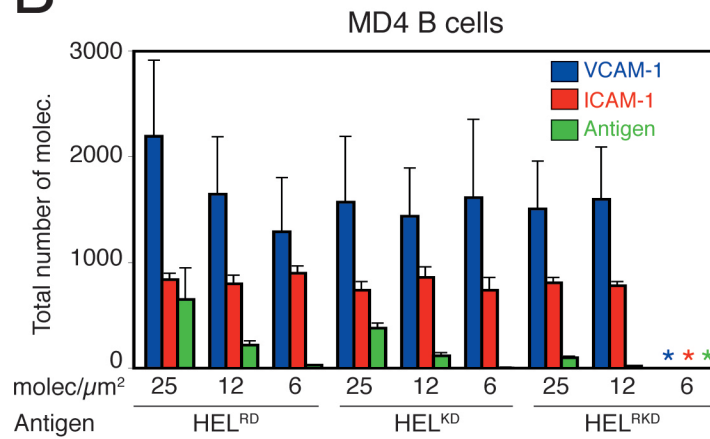**Supplemental Figure 2.**

(A) Naïve MD4 B cells were settled on membranes containing constant amounts of GPI-linked ICAM-1 (red) and GPI-linked VCAM-1 (blue) (50 and 25 mol ec/ $\mu\text{m}^2$ , respectively), and different lysozymes as antigens (green) at 25 molec/ $\mu\text{m}^2$ : HEL<sup>RD</sup> ( $K_A=2 \times 10^9 \text{ M}^{-1}$ ), HEL<sup>KD</sup> ( $K_A\sim 3 \times 10^7 \text{ M}^{-1}$ ), HEL<sup>RKD</sup> ( $K_A\sim 3 \times 10^6 \text{ M}^{-1}$ ). DIC, fluorescence and merged images from a representative B cell are shown. (B) Quantification of the total number of molecules of VCAM-1, ICAM-1, and antigen recruited in the B cell synapse. Data represent the mean of 50 cells in each case. Scale bar, 1 $\mu\text{m}$ .
